health data. Beside this however, a wide range of health information (HI) activities are often funded through ad hoc projects as opposed to more sustainable structures. This lack of continuity results in lost expertise, data collection mechanisms, and networks, as well as a limited integration of results at (inter)national level. A permanent governance structure with significant political support will enable better research and integration of outcomes in policies for public health.

#### **Objectives:**

Within the Joint Action on Health Information (InfAct) an Assembly of Members (AoM) is established where stakeholders come together to make strategic decisions on a future structure for EU HI and to find ways to integrate the results of InfAct at (inter)national level. InfAct aims to engage stakeholders and to find consensus among MSs on the way forward. The AoM can form the bases for a more permanent board for discussions among MSs in a future European Research Infrastructure Consortium on Health Information for Research and Evidence-based Policy (HIREP-ERIC).

#### **Methods:**

InfAct will invite high level representatives of Ministries of Health and Research of EU and associated countries. Three strategic meetings will be set up to present the findings of InfAct and find consensus through a Memorandum of Understanding on an infrastructure for EU HI. The AoM representatives will be able to provide guidance on a business plan and roadmap for a sustainable public health and research infrastructure for EU HI with adequate resources.

#### **Conclusions:**

Providing a platform for high level discussions will allow for strategic decisions on an infrastructure for EU HI to be taken. Additionally, key stakeholders will be able to provide input on activities carried out by InfAct. The uptake of the outcomes of InfAct at (inter)national level will be enhanced through the AoM.

## **Finding political support and sustainability beyond EU health information projects**

Isabel Noguer

*I Noguer-Zambrano<sup>1</sup>, A Padron-Monedero<sup>1</sup>, A C Viso<sup>2</sup>, P Bogaert<sup>3</sup>, L A Abboud<sup>3</sup>, H Van Oyen<sup>3</sup>*

<sup>1</sup>Carlos III Institute of Health, Madrid, Spain

<sup>2</sup>French Public Health Agency, Saint-Maurice, France

<sup>3</sup>Sciensano, Brussels, Belgium

Contact: [inoguer@isciii.es](mailto:inoguer@isciii.es)

#### **Background:**

Under the lead of Eurostat, the European Statistical System provides a solid working basis for gathering and providing
